# Supplementary material for: Sodium doping for enhanced performance by highly efficient CsPbBr3 quantum dot-based electroluminescent light-emitting diodes
Source: Royal Society of Chemistry journal article supplement (doi:10.1039/d1tc05997a), 2022-01-01
Supplement: d1tc05997a1.pdf [file d1tc05997a1.pdf]

# Sodium Doping for Enhanced Performance of Highly Efficient CsPbBr<sub>3</sub> quantum dots-Based Electroluminescence Light-Emitting Diodes

*Yi Huang<sup>a</sup>, Pengfei Tang<sup>a</sup>, Wenxia Zhang<sup>a\*</sup>, Wensheng Yan<sup>a</sup>, Bin Liu<sup>b</sup> Xiaosheng  
Tang<sup>a,c\*</sup>, Zhen Wang<sup>a</sup>, Yue Peng<sup>a</sup>, Weiwei Chen<sup>a\*</sup>*

<sup>a</sup>College of Optoelectronic Engineering, Chongqing University of Post and  
Telecommunications, Chongqing 400065, People's Republic of China

<sup>b</sup>School of Electronic Science and Engineering, Nanjing University Nanjing 210093,  
People's Republic of China

<sup>c</sup>School of Materials Science and Engineering, Zhengzhou University, Zhengzhou  
450001, People's Republic of China

E-mail: zhangwx@cqupt.edu.cn, xstang@cqupt.edu.cn, chenww@cqupt.edu.cn

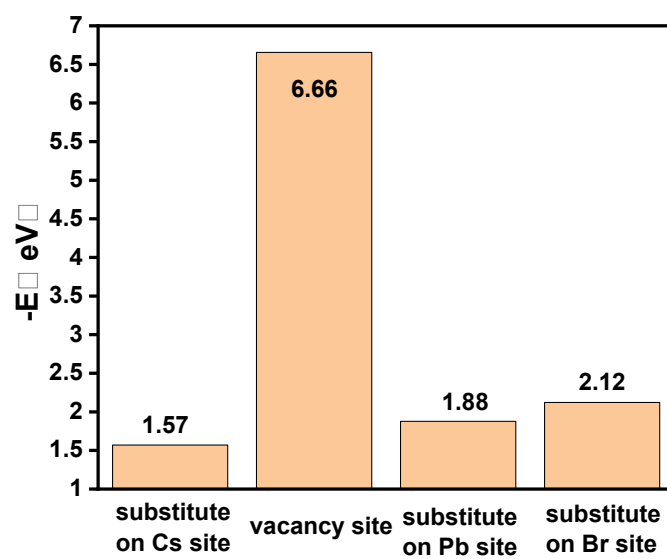

Figure S1. The formation energy for the sodium substitute on Cs site, vacancy site, Pb site and Br cite in the perovskite cubic structure.

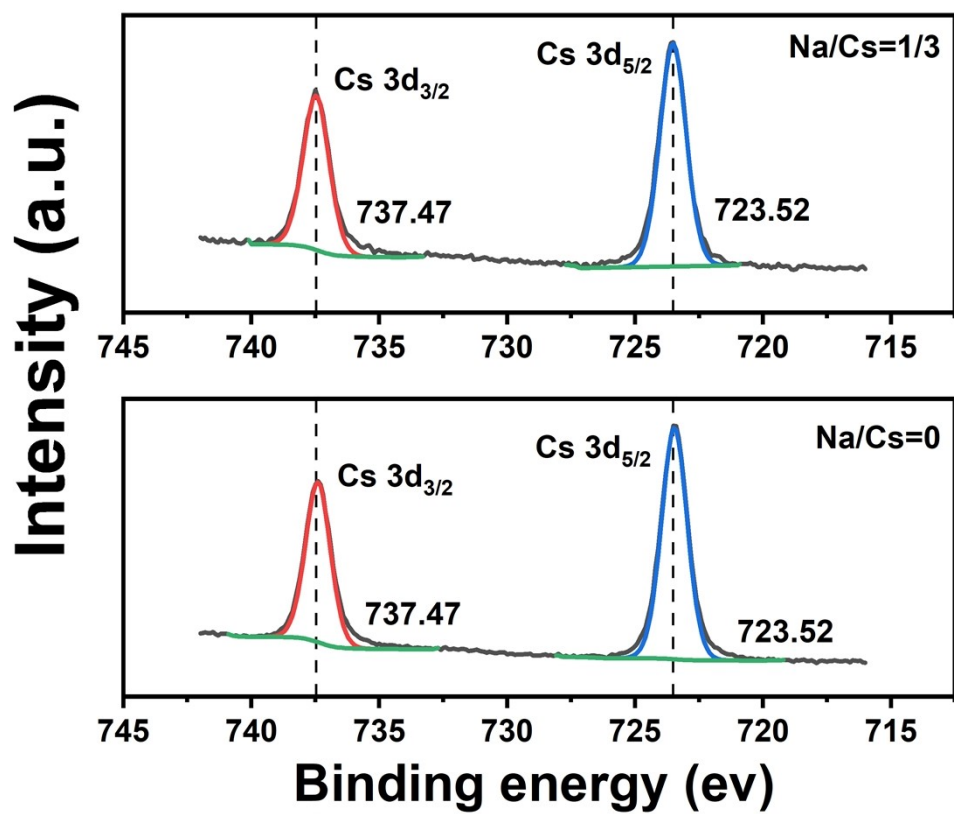

**Figure S2.** High-resolution XPS spectrum of Cs 3d<sub>3/2</sub> and Cs 3d<sub>5/2</sub> signal in Na<sup>+</sup>-doped and undoped CsPbBr<sub>3</sub> QDs.

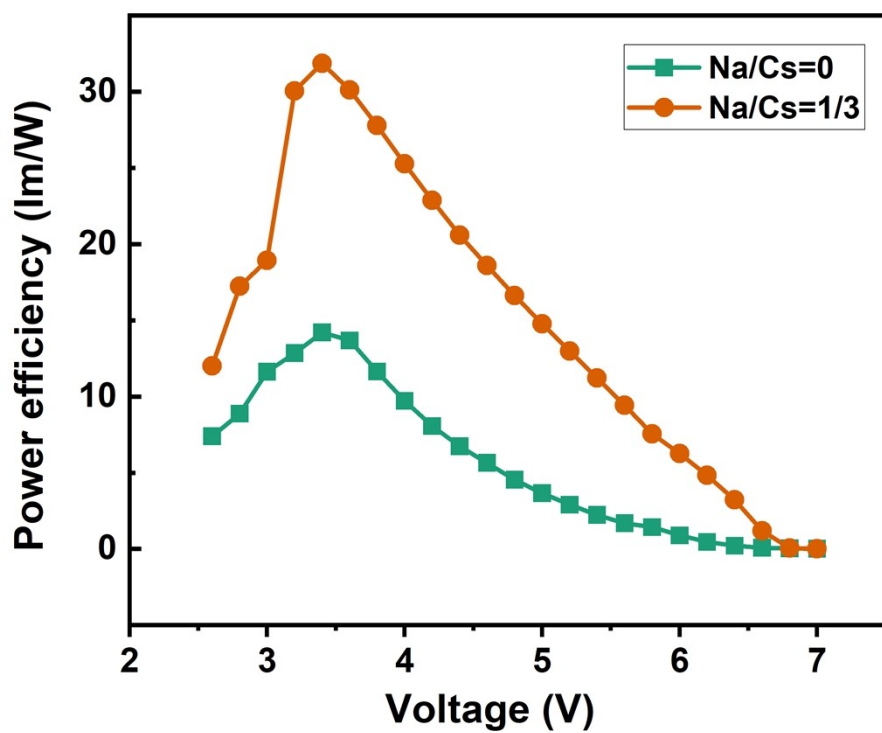

**Figure S3.** Power efficiency -voltage of the QLED device with undoped and Na<sup>+</sup>-doped CsPbBr<sub>3</sub> QDs as an emitting layer.

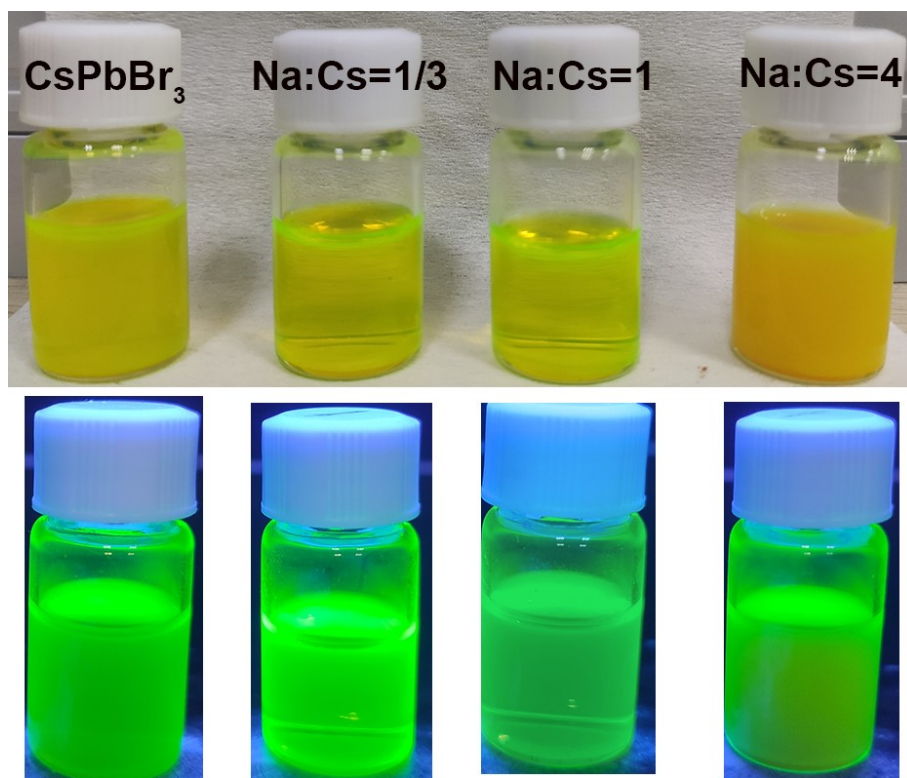

**Figure S4.** Pictures of  $\text{CsPbBr}_3$  QDs and Na:  $\text{CsPbBr}_3$  QDs under room light and 365 nm ultraviolet light.

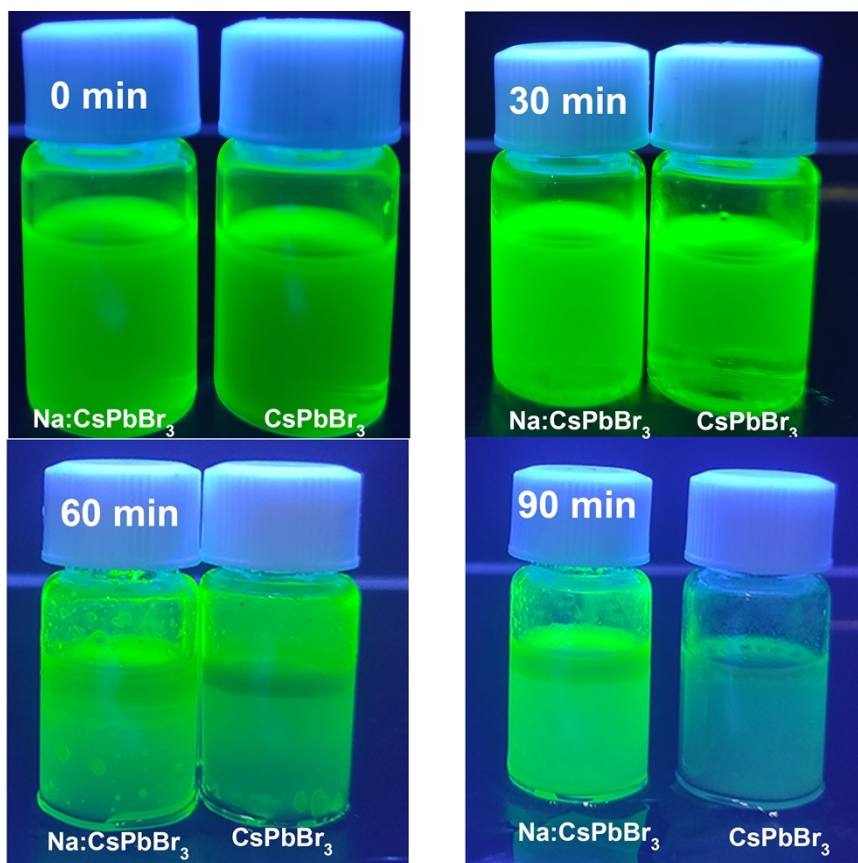

**Figure S5.** The photographs of CsPbBr<sub>3</sub> QDs and Na: CsPbBr<sub>3</sub> QDs in water and hexane mixture solution under 365 nm ultraviolet light.

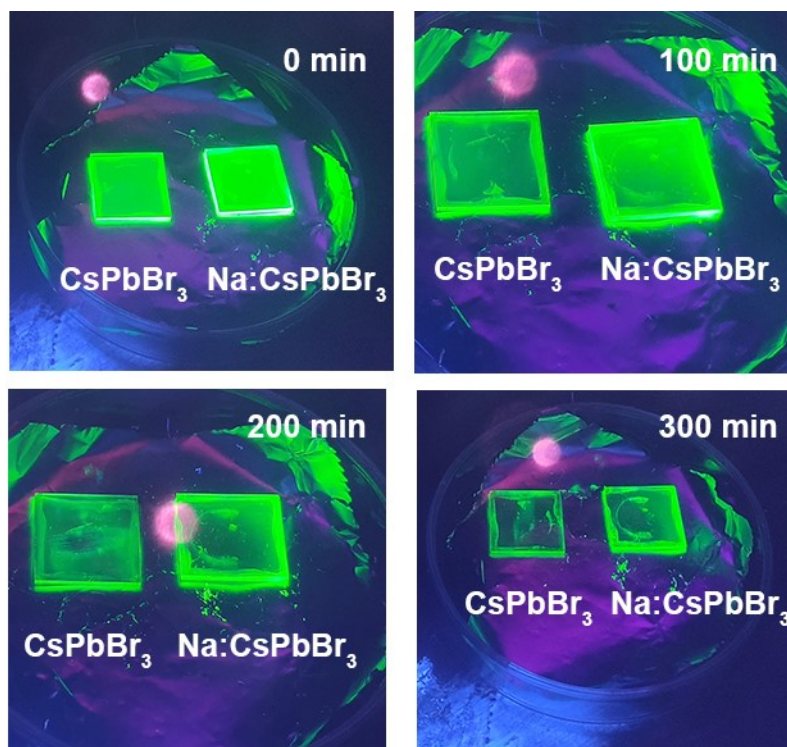

**Figure S6.** The photographs of the CsPbBr<sub>3</sub> QDs and Na: CsPbBr<sub>3</sub> QDs films under 365 nm ultraviolet light, the pictures were taken every 100 min.

**Table S1.** Summary of EL performance of Na<sup>+</sup>-doped and undoped CsPbBr<sub>3</sub> QLED devices

| Na/Cs | V <sub>t</sub><br>(V) | Current efficiency<br>(cd A <sup>-1</sup> ) | Power<br>efficiency<br>(lm W <sup>-1</sup> ) | Luminance<br>(cd m <sup>-2</sup> ) | EQE<br>(%) |
|-------|-----------------------|---------------------------------------------|----------------------------------------------|------------------------------------|------------|
| 0     | 2.6                   | 15.67                                       | 14.21                                        | 3431                               | 4.73       |
| 1/3   | 2.5                   | 34.51                                       | 31.84                                        | 20190                              | 8.97       |



**Table S2.** Summary of the performances of QLEDs based on CsPbBr<sub>3</sub> perovskite QDs.

| Year | EL<br>peak (nm) | Max.<br>EQE (%) | Max.<br>L (cd/m <sup>2</sup> ) | Refs.    |
|------|-----------------|-----------------|--------------------------------|----------|
| 2015 | 516             | 0.12            | 946                            | [1]      |
| 2016 | 516             | 0.06            | 1377                           | [2]      |
| 2016 | 523             | 0.19            | 2335                           | [3]      |
| 2017 | 525             | 0.43            | 8911                           | [4]      |
| 2017 | 513             | 2.1             | 11990                          | [5]      |
| 2017 | 512             | 8.73            | 1660                           | [6]      |
| 2018 | 516             | 6.5             | 7085                           | [7]      |
| 2018 | 518             | 4.62            | 10206                          | [8]      |
| 2018 | 508             | 8.08            | 1000                           | [9]      |
| 2019 | 517             | 9.7             | 2270                           | [10]     |
| 2020 | 519             | 0.55            | 2011                           | [11]     |
| 2020 | 513             | 5.9             | 24458                          | [12]     |
| 2020 | 524             | 5.6             | 5760                           | [13]     |
| 2021 | 518             | ~               | 833                            | [14]     |
| 2021 | 516             | 6.05            | 32747                          | [15]     |
| 2021 | 517             | 4.81            | 92279                          | [16]     |
| 2021 | 525             | <b>8.97</b>     | <b>20190</b>                   | Our work |

## References:

- [1] Q. Shan, J. Li, J. Song, Y. Zou, L. Xu, J. Xue, Y. Dong, C. Huo, J. Chen, B. Han, H. Zeng, *J. Mater. Chem. C* 2017, **5**, 4565.
- [2] H. L. Zhu, J. Cheng, D. Zhang, C. Liang, C. J. Reckmeier, H. Huang, A. L. Rogach, W. C. H. Choy, *Acs Nano* 2016, **10**, 6808.
- [3] G. Li, F. W. R. Rivarola, N. J. L. K. Davis, S. Bai, T. C. Jellicoe, F. de la Peña, S. Hou, C. Ducati, F. Gao, R. H. Friend, N. C. Greenham, Z. Tan, *Adv. Mater.* 2016, **28**, 3528.
- [4] X. Zhang, B. Xu, W. Wang, S. Liu, Y. Zheng, S. Chen, K. Wang, X. W. Sun, *Acs Appl. Mater. Inter.* 2017, **9**, 4926.
- [5] H. Wu, Y. Zhang, M. Lu, X. Zhang, C. Sun, T. Zhang, V. L. Colvin, W. W. Yu, *Nanoscale* 2018, **10**, 4173.
- [6] T. Chiba, K. Hoshi, Y. Pu, Y. Takeda, Y. Hayashi, S. Ohisa, S. Kawata, J. Kido, *Acs Appl. Mater. Inter.* 2017, **9**, 18054.
- [7] Y. Tan, Y. Zou, L. Wu, Q. Huang, D. Yang, M. Chen, M. Ban, C. Wu, T. Wu, S. Bai, T. Song, Q. Zhang, B. Sun, *Acs Appl. Mater. Inter.* 2018, **10**, 3784.
- [8] Z. Shi, Y. Li, S. Li, X. Li, D. Wu, T. Xu, Y. Tian, Y. Chen, Y. Zhang, B. Zhang, *Adv. Funct. Mater.* 2018, **28**, 1707031.
- [9] M. Lu, X. Zhang, X. Bai, H. Wu, X. Shen, Y. Zhang, W. Zhang, W. Zheng, H. Song, W. W. Yu, A. L. Rogach, *ACS Energy Lett.* 2018, **3**, 1571.
- [10] J. H. Park, A.-Y. Lee, J. C. Yu, Y. S. Nam, Y. Choi, J. Park, M. H. Song, *ACS Appl. Mater. Inter.* 2019, **11**, 8428.
- [11] R. Shen, S. Yang, P. Lin, *ACS Appl. Electron. Mater.* 2020, **2**, 1619.
- [12] J. Yao, J. Zhang, L. Wang, K. Wang, X. Ru, J. Yang, J. Wang, X. Chen, Y. Song, Y. Yin, Y. Lan, Q. Zhang, H. Yao, *J. Phys. Chem. Lett.* 2020, **11**, 9371.
- [13] M. T. Hoang, A. S. Pannu, C. Tang, Y. Yang, N. D. Pham, K. Gui, X. Wang, S. Yambem, P. Sonar, A. Du, H. Wang, *Adv Opt. Mater.* 2020, **8**, 2000742.
- [14] H. Kim, S. R. Bae, T. H. Lee, H. Lee, H. Kang, S. Park, H. W. Jang, S. Y. Kim, *Adv Funct. Mater.* 2021, **31**, 2102770.
- [15] B. Zhou, P. Wang, S. Geng, M. Wang, L. Qin, Y. Wen, R. Chen, *ACS Appl. Electron. Mater.* 2021, **3**, 2398.

[16] S. Geng, Y. Wen, B. Zhou, Z. Wang, Z. Wang, P. Wang, Y. Jing, K. Cao, K. Wang, R. Chen, *ACS Appl. Electron. Mater.* 2021, **3**, 2362.
